# Supplementary material for: A translational approach to capture gait signatures of neurological disorders in mice and humans
Source: PubMed Central journal article supplement (PMC5468293; doi:10.1038/s41598-017-03336-1), 2017-06-12
Supplement: 41598_2017_3336_MOESM1_ESM.pdf [file 41598_2017_3336_MOESM1_ESM.pdf]

**A translational approach to capture gait signatures of neurological disorders in mice and humans**

Lauren Broom<sup>1</sup>, Brian A Ellison<sup>1</sup>, Audrey Worley<sup>1</sup>, Lara Wagenaar<sup>1</sup>, Elina Sörberg<sup>1</sup>,  
Christine Ashton<sup>1</sup>, David A Bennett<sup>2</sup>, Aron S Buchman<sup>2</sup>, Clifford B Saper<sup>1</sup>, Ludy C Shih<sup>1</sup>,  
Jeffrey M Hausdorff<sup>3</sup>, Veronique G VanderHorst\*<sup>1</sup>

<sup>1</sup> Department of Neurology, Division of Movement Disorders, Beth Israel Deaconess Medical Center, Harvard Medical School, Boston, MA 02215, USA

<sup>2</sup> Rush Alzheimer's Disease Center, Rush University Medical Center, Chicago, IL 60612, USA

<sup>3</sup> Center for the Study of Movement Cognition and Mobility, Tel-Aviv Sourasky Medical Center, Tel Aviv 64239, and Sagol School of Neuroscience and Sackler Faculty of Medicine, Tel Aviv University, Tel Aviv, Israel

**Corresponding author:** Veronique VanderHorst

Beth Israel Deaconess Medical Center

Center for Life Sciences, CLS 706

Boston MA 02115

Phone: 617 735 3201

Fax: 617 735 3252

Email: [vvanderh@bidmc.harvard.edu](mailto:vvanderh@bidmc.harvard.edu)

Figure S1

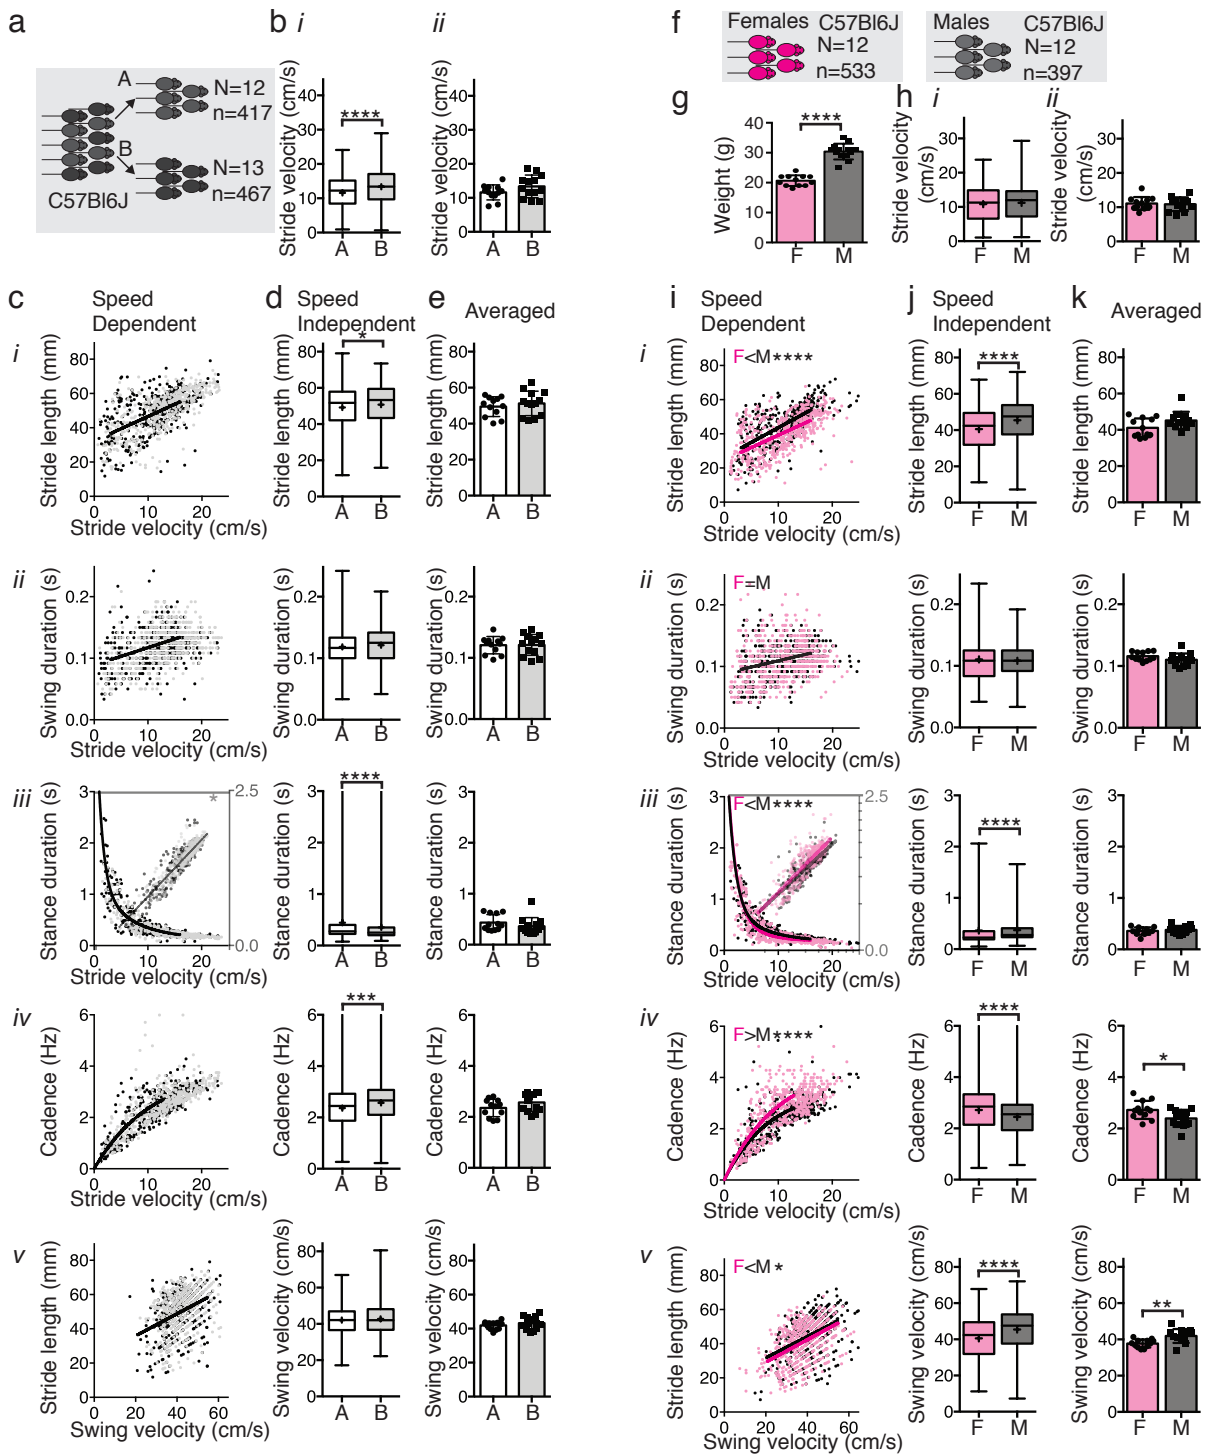

**Supplementary Figure S1: Gait parameters during walking: effects of sex, strain and experimental variables**  
**a:** Gait parameters were measured in two cohorts with the same genetic background, shipment, age, and sex. **b:** Box and whisker plots (i) show the distribution of stride-to-stride velocity (Mann Whitney Rank test) and (ii) bar graphs with scatter plots represent average stride velocity (two-tailed t-test), with error bars indicating standard deviation. **c:** Relationships of stride length (i), swing duration (ii), stance duration (iii), and cadence (iv) as a function of stride velocity and stride length as a function of swing speed (v) were captured with non-linear regression models using parameters listed in Supplementary Table S2. The fit of one curve to both data sets was compared with the fit of individual curves fit to each dataset (Supplementary Table S3). **d (i-v) and e (i-v):** Stride-to-stride data represented as whisker plots (Mann Whitney Rank test, Supplementary Table S3; bars indicate maximum and minimum) and bar graphs with scatter plots represent averaged data (unpaired 2-tailed t-test, Supplementary Table S3; bars indicate standard deviation). **f:** Gait parameters were measured in two cohorts with the same genetic background and age, but different sex. **g:** Bar graphs with scatter plots showing the average weight in the female and male cohorts (2 tailed unpaired t-test; Supplementary Table S3). **h (i-ii), i-k (i-v):** legends as in b-e, Supplementary Table S3.

Figure S2

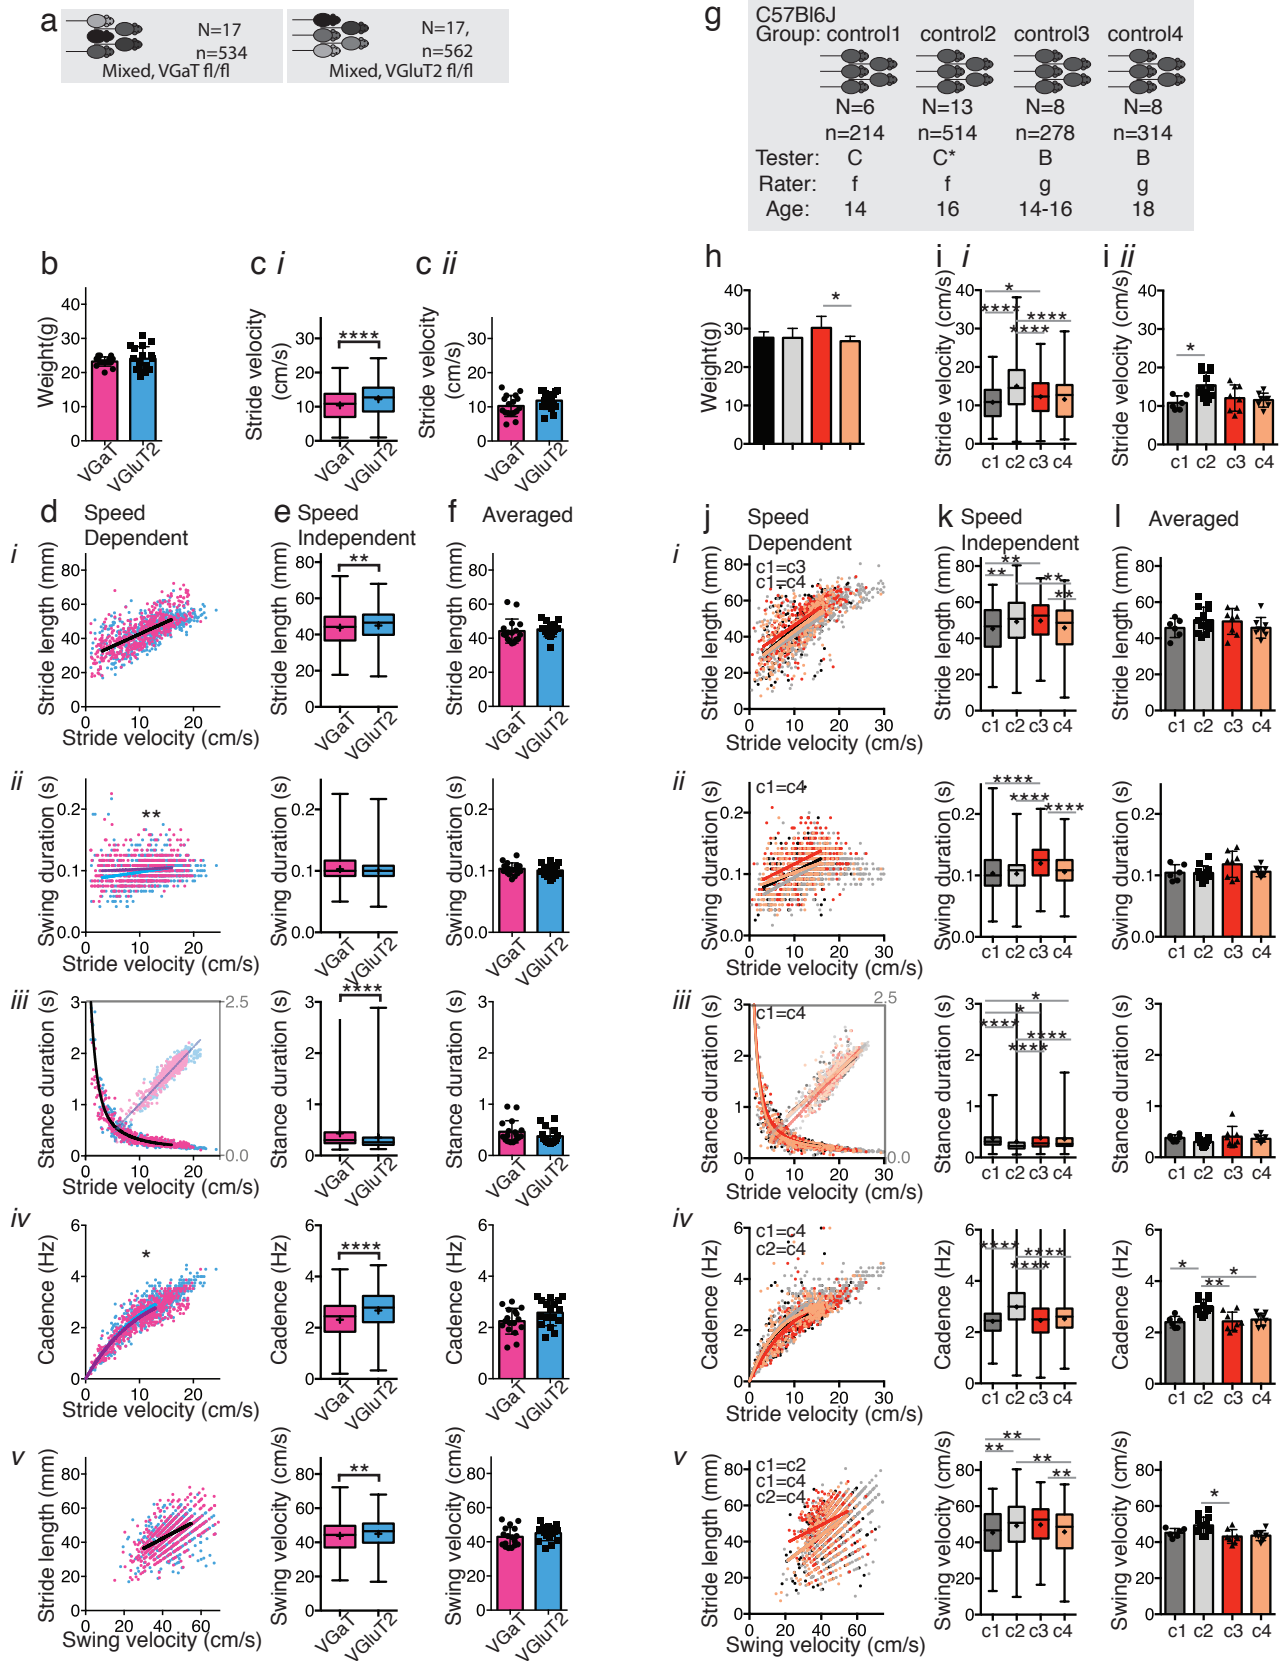

## **Supplementary Figure S2: Gait parameters during walking: effects of strain and experimental variables**

**a:** Gait parameters were measured in cohorts of male mice with different mixed genetic backgrounds, with otherwise similar experimental conditions. **b:** Weight comparisons between both groups depicted in bar graphs with scatter plots (two-tailed t-test; error bars indicate standard deviation). **c:** Box and whisker plots (i) show the distribution of stride-to-stride velocity (Mann Whitney Rank test; Supplementary Table S3) and (ii) bar graphs with scatter plots represent average stride velocity (2-tailed t-test; Supplementary Table S3), with error bars indicating standard deviation. **d:** Relationships of stride length (i), swing duration (ii), stance duration (iii), cadence (iv) as a function of stride velocity and stride length as a function of swing speed (v) were captured with non-linear regression models using parameters listed in Supplementary Table S2. The fit of one curve to both data sets was compared with the fit of individual curves fit to each dataset (Supplementary Table S3). **e and f** (i-v): Stride-to-stride data represented as whisker plots (Mann Whitney Rank test; Supplementary Table S3) and bar graphs with scatter plots represent averaged data (unpaired 2-tailed t-test; Supplementary Table S3). **g:** Gait parameters were measured in 4 cohorts of male mice with the same genetic background and age range, but each from a different shipment and with partially different testers and raters. In contrast to all other datasets, a male assistant was present during gait testing of cohort 2. **h:** Comparison of weight among groups depicted in bar graphs with scatter plots (ANOVA, followed by Dunn's post hoc test; error bars indicate standard deviation; Supplementary Table S3). **i:** Box and whisker plots show the distribution of stride-to-stride velocity (Kruskall Wallis, Supplementary Table S3; bars indicate maximum and minimum) and bar graphs with scatter plots representing average stride velocity (ANOVA, followed by Dunn's post hoc test, Supplementary Table S3; error bars indicate standard deviation). **j:** Relationships of stride length (i), swing duration (ii), stance duration (iii), cadence (iv) and swing speed (v) as a function of stride velocity. The fit of one curve to both data sets was compared with the fit of individual curves fit to each dataset (Supplementary Table S3). **k** (i-v): The distribution of the stride-to-stride data among cohorts in box and whisker plots (Kruskall Wallis, followed by Dunn's multiple comparison test; Supplementary Table S3). **l** (i-v): The distribution of averaged data among cohorts in bar graphs with scatter plots (ANOVA, followed by post hoc Dunn's multiple comparison test; Supplementary Table S3).

Figure S3

**a Example I, straight line fit:**

Samples: Stride length and stride velocity of datasets 4 and 5 (Supplementary Table S1)  
 Fitting Parameters for Stride length, Supplementary Table S2:

Straight line, No Constraint, Range 3 to 16 cm/s (Supplementary Table S2)

- i. Organize data: XY table: Enter and plot a single Y for each X point  
 Column A: stride length dataset 4 with associated stride velocity in Column X  
 Column B: **stride length dataset 5 with associated stride velocity in Column X**
- ii. Analyze: Choose type and datasets:  
 Non-linear regression of data sets in columns A and B
- iii. Fit: Choose Equation and fitting method:  
**Straight line**; least squares fit
- iv. Compare: Does one curve adequately fit all the data sets?  
 Extra sum of squares F test and **set P value**
- v. Constrain: Yintercept no constraint, Slope no constraint
- vi. Range: do not fit points when X is less than **3**  
 do not fit points when X is greater than **16**
- vii. Fit the curve Result: One curve for all datasets

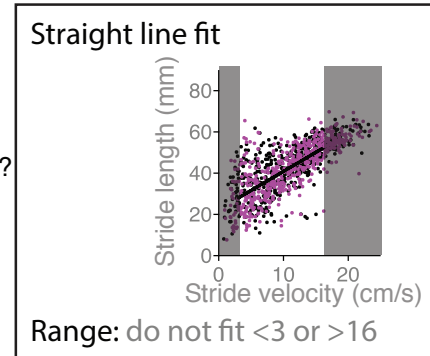

**b Example II, one phase or two phase associaton fit:**

Samples: Cadence and stride velocity of datasets 16 and 17 (Supplementary Table S1)  
 Fitting Parameters for cadence, Supplementary Table S2:

One phase association, Constraint  $Y_0=0$ , Range 0 to 13 cm/s

- i. Organize data: XY table: Enter and plot a single Y for each X point  
 Column A: cadence dataset 16 with associated stride velocity in column X  
 Column B: **cadence dataset 17 with associated stride velocity in column X**
- ii. Analyze: Choose type and datasets:  
 Non-linear regression of data sets in columns A and B
- iii. Fit: Choose Equation and fitting method:  
 Equation: **1 phase association**; least squares fit
- iv. Compare: Does one curve adequately fit all the data sets?  
 Extra sum of squares F test and **set P value**
- v. Constrain:  **$Y_0=0$** , Plateau no constraint
- vi. Range: do not fit points when X is less than **0**  
 do not fit points when X is greater than **13**
- vii. Fit the curve Result: Different curve for each dataset

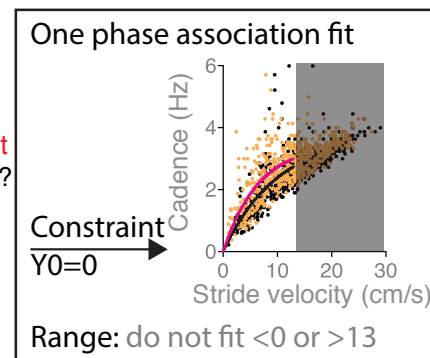

**Supplementary Figure 3: Step-by-step guide for the application of curve fitting parameters to compare two datasets**

**a:** Example I summarizes the sequential steps (i-vii) necessary to compare 2 datasets that fit a straight line, i.e. stride length, using Graphpad Prism software. Samples are taken from datasets 4 and 5 (Supplementary Table S1; see also Figure 2). Fitting parameters relevant for this example (indicated in red) as well as for other datasets that match straight lines are summarized in Supplementary Table S2. **b:** Example II summarizes the sequential steps (i-vii) necessary to compare 2 datasets that fit a one phase association, i.e. cadence. Samples are taken from datasets 16 and 17 (Supplementary Table S1; see also Figure 3). Fitting parameters relevant for this example (indicated in red) as well as for datasets that fit two phase associations, i.e. stance duration, are summarized in Supplementary Table S2.

**Supplementary Table 1: Overview of mouse datasets**

| Dataset | Genotype                                   | Sex | #/cohort | Age (wks) | Equipment | Tester | Rater | Condition/Purpose                            |
|---------|--------------------------------------------|-----|----------|-----------|-----------|--------|-------|----------------------------------------------|
| 1       | C57Bl6/J;129P3/J                           | M   | 18       | 10-12     | Runway A  | A      | d     | Large versus Small runway                    |
| 2       | C57Bl6/J;129P3/J                           | M   | 16       | 14-18     | Runway B  | A      | a     | Large versus Small runway                    |
| 3       | C57Bl6J                                    | M   | 14       | 10        | Runway A  | B      | e     | Large versus Small runway                    |
| 4       | C57Bl6J                                    | M   | 15       | 10        | Runway A  | B      | e     | Within group reproducibility                 |
| 5       |                                            |     |          | 11        | Runway A  | B      | e     | Within group reproducibility                 |
| 6       | C57Bl6J                                    | M   | 12       | 14-16     | Runway A  | B      | e     | Sex comparison; Reproducibility              |
| 7       | C57Bl6J                                    | F   | 12       | 15        | Runway A  | B      | e     | Sex comparison                               |
| 8       | VGaT <sup>fl/fl</sup> , C57Bl6/J;129P3/J   | M   | 17       | 10-12     | Runway A  | A      | d     | Genetic background; Reproducibility          |
| 9       | VGlut2 <sup>fl/fl</sup> , C57Bl6/J;129P3/J | M   | 17       | 10-12     | Runway A  | A      | d     | Genetic background; Reproducibility          |
| 10      | C57Bl6J                                    | M   | 6        | 14        | Runway A  | C      | f     | Baseline; Reproducibility                    |
| 11      |                                            |     |          | 17        | Runway A  | C      | f     | Disease model: 6-OHDA                        |
| 12      | C57Bl6J                                    | M   | 13       | 16        | Runway A  | C*     | f     | Baseline; Reproducibility                    |
| 13      |                                            |     |          | 20        | Runway A  | C*     | f     | Disease model: 6-OHDA                        |
| 14      | C57Bl6J                                    | M   | 12       | 14-18     | Runway A  | B      | g     | Baseline; Sex comparison; Reproducibility    |
| 15      |                                            |     |          | 17-22     | Runway A  | B      | g     | Disease model: 6-OHDA                        |
| 16      | C57Bl6J                                    | M   | 17       | 14-16     | Runway A  | B      | g, e  | Baseline; Reproducibility                    |
| 17      |                                            |     |          | 24        | Runway A  | B      | g, e  | Disease model: s.c. MPTP                     |
| 18      | C57Bl6J                                    | M   | 10       | 10        | Runway A  | C      | f     | Baseline                                     |
| 19      |                                            |     |          | 28        | Runway A  | C      | f     | Disease model: AAV $\alpha$ -synuclein mPMRF |
| 20      |                                            |     |          | 28        | Runway A  | C      | f     | Control: AAV-GFP mPMRF                       |

\* Male assistant was present during testing. All testers were female.

**Supplementary Table 2:****Regression analysis parameters for gait measures in mice**

| <b>Gait parameter</b>                                                                                                         | <b>Curve</b>          | <b>Constraints</b>                                     | <b>Range</b>    |
|-------------------------------------------------------------------------------------------------------------------------------|-----------------------|--------------------------------------------------------|-----------------|
| Stride length<br>Y: Stride length (mm)<br>X: Stride velocity (cm/sec)                                                         | Straight line         | No constraints                                         | 3 to 16 cm/s    |
| Swing duration<br>Y: Swing time (sec)<br>X: Stride velocity (cm/sec)                                                          | Straight line         | No constraints                                         | 3 to 16 cm/s    |
| Stance duration<br>Y: Stance time (sec)<br>X: Stride velocity (cm/sec)                                                        | Two phase association | Plateau $0 < x < 0.17$<br>Y0=6, Males<br>Y0=5, Females | 0- 3 to 16 cm/s |
| Cadence (Step frequency)<br>Y: Cadence (Hz)<br>X: Stride velocity (cm/sec)                                                    | One phase association | Y=0                                                    | 0 to 13 cm/s    |
| Stride length as a function of Swing speed (Stride length /Swing time)<br>Y: Stride length (mm)<br>X: Swing velocity (cm/sec) | Straight line         | No constraint                                          | 20 to 55 cm/s   |
| Log stance duration<br>Y: $0.9 - \log(\text{stance})$<br>X: $(\log \text{ speed}) + 0.6$                                      | Straight line         | No constraint                                          | Full            |

**Table 3 Supplemental**  
**Statistical results**

**Figure 1 C**

| Test            | Mann-Whitney test |          | unpaired 2-tailed t-test |          | F test       |    |
|-----------------|-------------------|----------|--------------------------|----------|--------------|----|
|                 | U                 | p        | t(df)=                   | p        | F (DFn, DFd) | p  |
| Stride velocity | 10290             | < 0.0001 | t=7.479 df=32            | < 0.0001 | NA           | NA |
| Stride length   | 9560              | < 0.0001 | t=7.750 df=32            | < 0.0001 | NA           | NA |
| Swing duration  | 30706             | < 0.0001 | t=3.888 df=32            | 0.0005   | NA           | NA |
| Stance duration | 12855             | < 0.0001 | t=5.558 df=32            | < 0.0001 | NA           | NA |
| Cadence         | 16577             | < 0.0001 | t=6.492 df=32            | < 0.0001 | NA           | NA |
| Swing speed     | 9633              | < 0.0001 | t=4.956 df=32            | < 0.0001 | NA           | NA |
| log stance      | 12639             | < 0.0001 |                          |          |              |    |

**Figure 2 C-G**

| Test            | Mann-Whitney test |      | paired 2-tailed t-test |      | F test          |      |
|-----------------|-------------------|------|------------------------|------|-----------------|------|
|                 | U                 | p    | t(df)                  | p    | F (DFn, DFd)    | p    |
| Stride velocity | 144638            | 0.43 | t=0.5938 df=13         | 0.56 |                 |      |
| Stride length   | 147342            | 0.79 | t=0.1460 df=13         | 0.89 | 1.059 (2,812)   | 0.35 |
| Swing duration  | 144149            | 0.32 | t=0.3352 df=13         | 0.74 | 0.6404 (2,813)  | 0.53 |
| Stance duration | 141390            | 0.12 | t=0.8082 df=13         | 0.43 | 1.949 (4,811)   | 0.10 |
| Cadence         | 142406            | 0.22 | t=0.8312 df=13         | 0.42 | 1.157 (2,865)   | 0.31 |
| Swing speed     | 148331            | 0.81 | t=1.810 df=13          | 0.09 | 0.6214 (2,1058) | 0.54 |
| log stance      |                   |      |                        |      | 4.446 (2,1090)  | 0.01 |

**Figure 3**

| Test            | Mann-Whitney test |          | paired 2-tailed t-test |      | F test         |          |
|-----------------|-------------------|----------|------------------------|------|----------------|----------|
|                 | U                 | p        | t(df)                  | p    | F (DFn, DFd)   | p        |
| Stride velocity | 178633            | 0.003    | t=0.7110 df=16         | 0.49 | -              | -        |
| Stride length   | 139905            | < 0.0001 | t=2.771 df=16          | 0.01 | 40.80 (2,867)  | < 0.0001 |
| Swing duration  | 145920            | < 0.0001 | t=2.918 df=16          | 0.01 | 17.23 (2,867)  | < 0.0001 |
| Stance duration | 189027            | 0.21     | t=0.03451 df=16        | 0.97 | 18.72 (4,908)  | < 0.0001 |
| Cadence         | 171374            | < 0.0001 | t=1.254 df=16          | 0.23 | 19.18 (2,638)  | < 0.0001 |
| Swing speed     | 139905            | < 0.0001 | t=1.503 df=16          | 0.15 | 48.52 (2,1150) | < 0.0001 |
| log stance      | -                 | -        | -                      | -    | 48.20 (2,1252) | < 0.0001 |

**Open Field** paired, 2 tailed t test

|               | t(df)         | p    |
|---------------|---------------|------|
| distance      | t=1.528 df=16 | 0.15 |
| time immobile | t=1.164 df=16 | 0.26 |
| average speed | t=1.098 df=16 | 0.29 |

**Figure 4**

| Test            | Mann-Whitney test |          | paired 2-tailed t-test |       | F test         |          |
|-----------------|-------------------|----------|------------------------|-------|----------------|----------|
|                 | U                 | p        | t(df)                  | p     | F (DFn, DFd)   | p        |
| Stride velocity | 493584            | < 0.0001 | t=1.340 df=28          | 0.19  | -              | -        |
| Stride length   | 450773            | < 0.0001 | t=2.975 df=28          | 0.006 | 13.92 (2,1545) | < 0.0001 |
| Swing duration  | 526538            | 0.08     | t=0.05437 df=28        | 0.96  | 1.346 (2,1541) | 0.26     |
| Stance duration | 543950            | 0.62     | t=0.3241 df=28         | 0.75  | 3.934 (4,1540) | 0.004    |
| Cadence         | 550744            | 0.87     | t=0.5386 df=28         | 0.59  | 2.361 (2,1187) | 0.09     |
| Swing speed     | 450571            | < 0.0001 | t=2.731 df=28          | 0.01  | 12.56 (2,1768) | < 0.0001 |
| log stance      | -                 | -        | -                      | -     | 27.35 (2,2108) | < 0.0001 |

**Open Field** paired, 2 tailed t test

|               | t(df)         | p      |
|---------------|---------------|--------|
| distance      | t=2.787 df=30 | 0.009  |
| time immobile | t=2.686 df=30 | 0.01   |
| average speed | t=4.411 df=30 | 0.0001 |

2 post animals no gait due to turning

**Figure 5**

| Test            | Kruskal-Wallis |        | Dunn's      |              |             | Kruskal-Wallis |      |
|-----------------|----------------|--------|-------------|--------------|-------------|----------------|------|
|                 | H              | p      | Base vs GFP | Base vs asyn | GFP vs asyn | KW             | p    |
| Stride velocity | 13.4           | 0.001  | *           | **           | ns          | 2.086          | 0.37 |
| Stride length   | 18.2           | 0.0001 | ns          | ****         | *           | 0.8233         | 0.69 |
| Swing duration  | 16.1           | 0.0003 | ns          | **           | **          | 1.429          | 0.51 |
| Stance duration | 16.4           | 0.0003 | ***         | *            | ns          | 0.4519         | 0.81 |
| Cadence         | 13.8           | 0.001  | ***         | ns           | ns          | 1.96           | 0.40 |
| Swing speed     | 18.2           | 0.0001 | ns          | ***          | *           | 0.8363         | 0.38 |

  

| Family p 0.05<br>Correction 0.01 | Base versus GFP        |      | Base versus asyn       |          | GFP vs asyn            |        |
|----------------------------------|------------------------|------|------------------------|----------|------------------------|--------|
|                                  | F test<br>F (DFn, DFd) | p    | F test<br>F (DFn, DFd) | p        | F test<br>F (DFn, DFd) | p      |
| Stride length                    | 4.497 (2,421)          | 0.01 | 4.454 (2,485)          | 0.01     | 8.035 (2,350)          | 0.0004 |
| Swing duration                   | 1.547 (2,419)          | 0.21 | 4.753 (2,485)          | 0.009    | 5.850 (2,346)          | 0.003  |
| Stance duration                  | 1.345 (4,467)          | 0.25 | 7.686 (4,541)          | < 0.0001 | 2.902 (4,346)          | 0.02   |
| Cadence                          | 1.297 (2,371)          | 0.27 | 3.659 (2,439)          | 0.03     | 5.284 (2,312)          | 0.006  |
| Swing speed                      | 0.1101 (2, 514)        | 0.90 | 6.481 (2, 578)         | 0.002    | 5.591 (2,368)          | 0.004  |
| log stance                       | 3.531 (2,616)          | 0.03 | 6.163 (2,708)          | 0.002    | 4.834 (2,440)          | 0.008  |

**Figure 6**

| Test            | Kruskal-Wallis |          | Dunn's        |             |             |
|-----------------|----------------|----------|---------------|-------------|-------------|
|                 | H              | p        | Ctrl A-Ctrl B | Ctrl B-PD B | Ctrl A-PD B |
| Stride velocity | 180            | < 0.0001 | < 0.0001      | < 0.0001    | < 0.0001    |
| Stride length   | 326            | < 0.0001 | 0.16          | < 0.0001    | < 0.0001    |
| Swing duration  | 84             | < 0.0001 | < 0.0001      | > 0.9999    | < 0.0001    |
| Stance duration | 260            | < 0.0001 | < 0.0001      | 0.009       | < 0.0001    |
| Cadence         | 331            | < 0.0001 | < 0.0001      | < 0.0001    | < 0.0001    |
| Swing speed     | 326            | < 0.0001 | 0.14          | < 0.0001    | < 0.0001    |

**Figure 15 A-E**

| Test            | Mann-Whitney test |          | unpaired 2-tailed t-test |      | F test        |      |
|-----------------|-------------------|----------|--------------------------|------|---------------|------|
|                 | U                 | p        | t(df)                    | p    | F (DFn, DFd)  | p    |
| Stride velocity | 79150             | < 0.0001 | t=1.552 df=23            | 0.13 |               |      |
| Stride length   | 89172             | 0.03     | t=0.7256 df=23           | 0.48 | 2.346 (2,616) | 0.10 |
| Swing duration  | 91977             | 0.17     | t=0.08439 df=23          | 0.93 | 1.002 (2,615) | 0.37 |



|                 |       |          |               |      |                |      |
|-----------------|-------|----------|---------------|------|----------------|------|
| Stance duration | 80440 | < 0.0001 | t=1.109 df=23 | 0.28 | 0.9308 (4,658) | 0.45 |
| Cadence         | 83266 | 0.0002   | t=1.547 df=23 | 0.14 | 0.6179 (2,443) | 0.54 |
| Swing speed     | 95327 | 0.59     | t=1.056 df=23 | 0.30 | 2.374 (2,818)  | 0.09 |
| log stance      |       |          |               |      | 1.248 (2,880)  | 0.29 |

**Figure S 1F-K** Males versus females, speed similar

| Test            | Mann-Whitney test |          | 2-tailed t-test |       | F test        |          |
|-----------------|-------------------|----------|-----------------|-------|---------------|----------|
|                 | U                 | p        | t(df)           | p     | F (DFn, DFd)  | p        |
| Stride velocity | 112347            | 0.41     | t=0.6088 df=22  | 0.55  | -             | -        |
| Stride length   | 79457             | < 0.0001 | t=1.978 df=22   | 0.06  | 23.27 (2,741) | < 0.0001 |
| Swing duration  | 102528            | 0.54     | t=1.620 df=22   | 0.12  | 2.271 (2,739) | 0.10     |
| Stance duration | 79002             | < 0.0001 | t=0.6749 df=22  | 0.51  | 7.601 (4,736) | < 0.0001 |
| Cadence         | 84819             | < 0.0001 | t=2.359 df=22   | 0.03  | 12.86 (2,551) | < 0.0001 |
| Swing speed     | 79457             | < 0.0001 | t=3.234 df=22   | 0.004 | 3.193 (2,870) | 0.04     |
| log stance      | -                 | -        | -               | -     | 40.72 (2,931) | < 0.0001 |

**Figure 2S A-F**

| Test            | mixed genetic background |          | 2-tailed t-test |      | F test          |       |
|-----------------|--------------------------|----------|-----------------|------|-----------------|-------|
|                 | U                        | p        | t(df)           | p    | F (DFn, DFd)    | p     |
| Stride velocity | 117398                   | < 0.0001 | t=1.613 df=32   | 0.12 | -               | -     |
| Stride length   | 133705                   | 0.002    | t=0.4683 df=32  | 0.64 | 2.522 (2,858)   | 0.08  |
| Swing duration  | 140569                   | 0.07     | t=0.7976 df=32  | 0.43 | 6.885 (2,858)   | 0.001 |
| Stance duration | 112320                   | < 0.0001 | t=1.357 df=32   | 0.18 | 1.622 (4,854)   | 0.17  |
| Cadence         | 108807                   | < 0.0001 | t=1.910 df=32   | 0.07 | 4.474 (2,665)   | 0.01  |
| Swing speed     | 138131                   | 0.002    | t=1.276 df=32   | 0.21 | 1.766 (2,875)   | 0.17  |
| log stance      | -                        | -        | -               | -    | 0.3305 (2,1092) | 0.72  |

**Figure 2S G-L** 4 unmatched baseline groups

| Test            | Kruskall Wallis 4 groups |          |                | Kruskall Wallis |        |                 |
|-----------------|--------------------------|----------|----------------|-----------------|--------|-----------------|
|                 | KW                       | p        | Dunn's         | KW              | p      | Dunn's          |
| Stride velocity | 126.9                    | < 0.0001 | see Fig 2S i-i | 10.21           | 0.02   | see Fig 2S i-ii |
| Stride length   | 27.3                     | < 0.0001 |                | 2.666           | 0.45   |                 |
| Swing duration  | 60.1                     | < 0.0001 |                | 2.333           | 0.51   |                 |
| Stance duration | 126.9                    | < 0.0001 |                | 4.691           | 0.20   |                 |
| Cadence         | 142.3                    | < 0.0001 |                | 17.02           | 0.0007 |                 |
| Swing speed     | 27.3                     | < 0.0001 |                | 11.36           | 0.010  |                 |
| log stance      | -                        | -        |                | -               | -      |                 |

4 groups

| Test            | F test (family 0.05) |            | <0.0001       |            | F test           |            | F test        |            | F test          |            | F test        |            |
|-----------------|----------------------|------------|---------------|------------|------------------|------------|---------------|------------|-----------------|------------|---------------|------------|
|                 | F (DFn, DFd)         | p          | F (DFn, DFd)  | p          | F (DFn, DFd)     | p          | F (DFn, DFd)  | p          | F (DFn, DFd)    | p          | F (DFn, DFd)  | p          |
|                 | 1 versus 2           | 1 versus 2 | 1 versus 3    | 1 versus 3 | 1 versus 4       | 1 versus 4 | 2 versus 3    | 2 versus 3 | 2 versus 4      | 2 versus 4 | 3 versus 4    | 3 versus 4 |
| Stride velocity | -                    | -          | -             | -          | -                | -          | -             | -          | -               | -          | -             | -          |
| Stride length   | 8.847 (2,483)        | 0.0002     | 2.700 (2,382) | 0.07       | 1.269 (2,428)    | 0.28       | 21.81 (2,505) | < 0.0001   | 4.937 (2,551)   | 0.008      | 7.682 (2,450) | 0.0005     |
| Swing duration  | 5.634 (2,483)        | 0.004      | 8.122 (2,382) | 0.0004     | 0.9030 (2,428)   | 0.41       | 33.26 (2,505) | < 0.0001   | 7.490 (2,551)   | 0.0006     | 14.95 (2,450) | < 0.0001   |
| Stance duration | 1.746 (4,479)        | 0.14       | 3.747 (4,378) | 0.005      | 0.2507 (4,424)   | 0.91       | 5.842 (4,501) | 0.0001     | 0.9410 (4,547)  | 0.44       | 5.184 (4,446) | 0.0004     |
| Cadence         | 5.097 (2,356)        | 0.007      | 1.439 (2,382) | 0.24       | 0.4986 (2,428)   | 0.61       | 7.769 (2,362) | 0.0005     | 0.5553 (2,376)  | 0.57       | 5.605 (2,469) | 0.004      |
| Swing speed     | 0.02371 (2,570)      | 0.98       | 12.10 (2,431) | < 0.0001   | 0.003314 (2,465) | 1.00       | 16.03 (2,649) | < 0.0001   | 0.06812 (2,683) | 0.93       | 16.06 (2,544) | < 0.0001   |
